# Supplementary material for: The Visibility of Changes in the Antioxidant Compound Profiles of Strawberry and Raspberry Fruits Subjected to Different Storage Conditions Using ATR-FTIR and Chemometrics
Source: MDPI journal article supplement (doi:10.3390/antiox12091719), 2023-09-05
Supplement: s1 [file s1]

## Supplementary materials

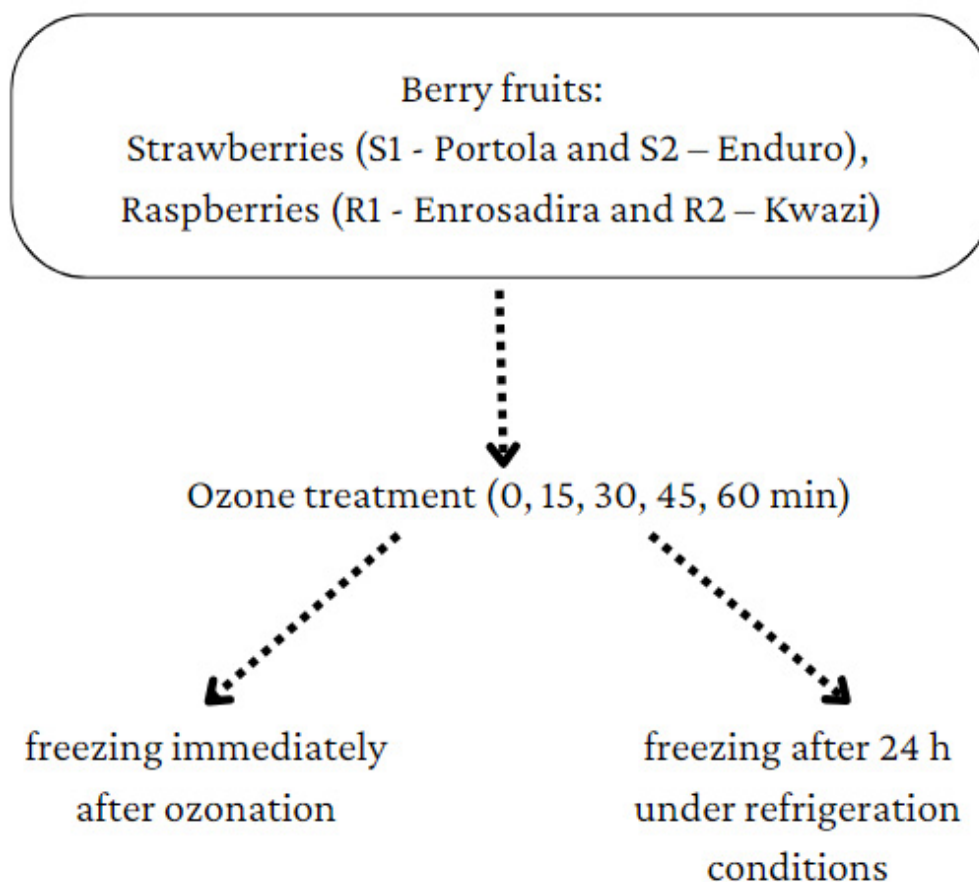

**Scheme S1.** Scheme of the plant material preparation experiment.

**Table S1.** The results for the assays: antioxidant activity against DPPH and ABTS, the total phenolic content (TPC) and total flavonoids content (TFC) for two cultivars of raspberry (R1, R2) and strawberry fruits (S1, S2). The results presented as mean values of triplicates.

| Cultivar | Storage<br>condition (h) | Ozonation<br>time (min) | ABTS <sup>1</sup> | DPPH <sup>1</sup> | TFC <sup>2</sup> | TPC <sup>3</sup> |
|----------|--------------------------|-------------------------|-------------------|-------------------|------------------|------------------|
| R1       | 0                        | 0                       | 0.3491            | 0.4217            | 52.0082          | 99.4557          |
| R1       | 0                        | 15                      | 0.3639            | 0.4105            | 52.3515          | 88.3994          |
| R1       | 0                        | 30                      | 0.3458            | 0.3412            | 50.2060          | 81.2795          |
| R1       | 0                        | 45                      | 0.3208            | 0.3914            | 48.9186          | 86.1744          |
| R1       | 0                        | 60                      | 0.3704            | 0.3499            | 50.2060          | 83.6072          |

|    |    |    |        |        |          |          |
|----|----|----|--------|--------|----------|----------|
| R1 | 24 | 0  | 0.2954 | 0.3859 | 49.9485  | 90.7270  |
| R1 | 24 | 15 | 0.3984 | 0.4191 | 50.6351  | 96.9569  |
| R1 | 24 | 30 | 0.3704 | 0.3919 | 48.1462  | 102.2284 |
| R1 | 24 | 45 | 0.4682 | 0.4342 | 50.5278  | 98.4545  |
| R1 | 24 | 60 | 0.3445 | 0.4173 | 50.2060  | 95.6305  |
| R2 | 0  | 0  | 0.4076 | 0.6321 | 110.0669 | 120.4046 |
| R2 | 0  | 15 | 0.4675 | 0.6784 | 106.8486 | 123.2286 |
| R2 | 0  | 30 | 0.4076 | 0.6132 | 106.2049 | 119.3777 |
| R2 | 0  | 45 | 0.4158 | 0.6461 | 99.1246  | 120.0195 |
| R2 | 0  | 60 | 0.4970 | 0.6945 | 119.7219 | 126.9083 |
| R2 | 24 | 0  | 0.4117 | 0.6872 | 104.5314 | 126.9768 |
| R2 | 24 | 15 | 0.4224 | 0.6421 | 102.3429 | 121.0464 |
| R2 | 24 | 30 | 0.3854 | 0.6505 | 105.8831 | 134.6529 |
| R2 | 24 | 45 | 0.3800 | 0.6254 | 108.5651 | 112.1894 |
| R2 | 24 | 60 | 0.3710 | 0.6712 | 105.3038 | 125.2311 |
| S1 | 0  | 0  | 0.5217 | 0.5226 | 27.3614  | 157.8070 |
| S1 | 0  | 15 | 0.7015 | 0.6787 | 44.9775  | 179.7638 |
| S1 | 0  | 30 | 0.6933 | 0.6828 | 44.2279  | 175.3983 |
| S1 | 0  | 45 | 0.6880 | 0.5633 | 24.7377  | 179.1215 |
| S1 | 0  | 60 | 0.6041 | 0.5226 | 19.8651  | 166.7950 |
| S1 | 24 | 0  | 1.1952 | 0.3178 | 109.4453 | 181.6898 |
| S1 | 24 | 15 | 1.1910 | 0.2626 | 83.5832  | 179.2500 |
| S1 | 24 | 30 | 1.1499 | 0.3533 | 84.3328  | 171.8025 |
| S1 | 24 | 45 | 1.1889 | 0.3470 | 95.9522  | 179.1215 |
| S1 | 24 | 60 | 1.1356 | 0.2348 | 50.5997  | 171.4178 |
| S2 | 0  | 0  | 0.5225 | 0.4983 | 40.8546  | 163.7133 |
| S2 | 0  | 15 | 0.4782 | 0.5141 | 30.7347  | 152.2855 |
| S2 | 0  | 30 | 0.6133 | 0.5495 | 37.1065  | 164.0985 |
| S2 | 0  | 45 | 0.5690 | 0.5656 | 38.3535  | 169.2348 |
| S2 | 0  | 60 | 0.6022 | 0.6062 | 56.9715  | 170.6473 |
| S2 | 24 | 0  | 0.5525 | 0.5089 | 51.3494  | 147.2778 |
| S2 | 24 | 15 | 0.4691 | 0.5127 | 42.7287  | 142.7835 |
| S2 | 24 | 30 | 0.6108 | 0.5720 | 55.8471  | 153.5698 |
| S2 | 24 | 45 | 0.5470 | 0.5124 | 43.8531  | 137.2623 |
| S2 | 24 | 60 | 0.5525 | 0.5093 | 41.9790  | 143.1690 |

<sup>1</sup>  $\mu$ mol Trolox/g fresh weight, <sup>2</sup> mg quercetin/100 g FW, <sup>3</sup> mg gallic acid/g fresh weight. The values are expressed as the mean (n = 3).

**Table S2.** GLM results. The effects of cultivar, ozonation time, storage condition and interaction between studied parameters (ABTS, DPPH, TFC, TPC) for raspberry and strawberry fruits.

| <i>Raspberry</i>  |                                        |           |                  |                |
|-------------------|----------------------------------------|-----------|------------------|----------------|
| ABTS              |                                        |           |                  |                |
| Parameter         | df                                     | Wald test | p                |                |
|                   | <i>Cultivar</i>                        | <b>1</b>  | <b>19.6816</b>   | <b>0.0000*</b> |
|                   | <i>Ozonation time</i>                  | 4         | 1.8781           | 0.7582         |
|                   | <i>Storage</i>                         | <b>1</b>  | <b>8.0324</b>    | <b>0.0046*</b> |
|                   | <i>Cultivar*Ozonation time*Storage</i> | 4         | 3.0637           | 0.5472         |
| DPPH              |                                        |           |                  |                |
| Parameter         | df                                     | Wald test | p                |                |
|                   | <i>Cultivar</i>                        | <b>1</b>  | <b>609.3716</b>  | <b>0.0000*</b> |
|                   | <i>Ozonation time</i>                  | 4         | 8.9061           | 0.0635         |
|                   | <i>Storage</i>                         | 1         | 1.8839           | 0.1699         |
|                   | <i>Cultivar*Ozonation time*Storage</i> | 4         | 2.6513           | 0.6178         |
| TFC               |                                        |           |                  |                |
| Parameter         | df                                     | Wald test | p                |                |
|                   | <i>Cultivar</i>                        | <b>1</b>  | <b>1789.4363</b> | <b>0.0000*</b> |
|                   | <i>Ozonation time</i>                  | 4         | 7.1329           | 0.1290         |
|                   | <i>Storage</i>                         | <b>1</b>  | <b>4.6380</b>    | <b>0.0313*</b> |
|                   | <i>Cultivar*Ozonation time*Storage</i> | 4         | 2.8590           | 0.5817         |
| TPC               |                                        |           |                  |                |
| Parameter         | df                                     | Wald test | p                |                |
|                   | <i>Cultivar</i>                        | <b>1</b>  | <b>202.7267</b>  | <b>0.0000*</b> |
|                   | <i>Ozonation time</i>                  | <b>4</b>  | <b>13.7308</b>   | <b>0.0082*</b> |
|                   | <i>Storage</i>                         | 1         | 2.4686           | 0.1161         |
|                   | <i>Cultivar*Ozonation time*Storage</i> | 4         | 2.6265           | 0.6221         |
| <i>Strawberry</i> |                                        |           |                  |                |
| ABTS              |                                        |           |                  |                |
| Parameter         | df                                     | Wald test | p                |                |
|                   | <i>Cultivar</i>                        | <b>1</b>  | <b>114.6871</b>  | <b>0.0000*</b> |
|                   | <i>Ozonation time</i>                  | 4         | 2.2925           | 0.6821         |
|                   | <i>Storage</i>                         | <b>1</b>  | <b>61.3847</b>   | <b>0.0000</b>  |
|                   | <i>Cultivar*Ozonation time*Storage</i> | 4         | 0.2959           | 0.9901         |
| DPPH              |                                        |           |                  |                |
| Parameter         | df                                     | Wald test | p                |                |
|                   | <i>Cultivar</i>                        | <b>1</b>  | <b>22.7662</b>   | <b>0.0000*</b> |
|                   | <i>Ozonation time</i>                  | 4         | 9.1366           | 0.0578         |
|                   | <i>Storage</i>                         | <b>1</b>  | <b>75.5393</b>   | <b>0.0000*</b> |
|                   | <i>Cultivar*Ozonation time*Storage</i> | 4         | 3.2742           | 0.5130         |
| TFC               |                                        |           |                  |                |
| Parameter         | df                                     | Wald test | p                |                |
|                   | <i>Cultivar</i>                        | <b>1</b>  | <b>13.3056</b>   | <b>0.0003*</b> |
|                   | <i>Ozonation time</i>                  | 4         | 6.7077           | 0.1522         |

|           |                                        |          |                |                |
|-----------|----------------------------------------|----------|----------------|----------------|
|           | <i>Storage</i>                         | <b>1</b> | <b>54.6497</b> | <b>0.0000*</b> |
|           | <i>Cultivar*Ozonation time*Storage</i> | <b>4</b> | <b>3.4446</b>  | <b>0.4864</b>  |
|           | <b>TPC</b>                             |          |                |                |
| Parameter |                                        | df       | Wald test      | p              |
|           | <i>Cultivar</i>                        | <b>1</b> | <b>68.2383</b> | <b>0.0000*</b> |
|           | <i>Ozonation time</i>                  | <b>4</b> | <b>1.7138</b>  | <b>0.7882</b>  |
|           | <i>Storage</i>                         | <b>1</b> | <b>8.8923</b>  | <b>0.0029*</b> |
|           | <i>Cultivar*Ozonation time*Storage</i> | <b>4</b> | <b>4.2025</b>  | <b>0.3793</b>  |

\*Values in the same column marked with an asterisk in superscript are statistically significant ( $p < 0.05$ ).

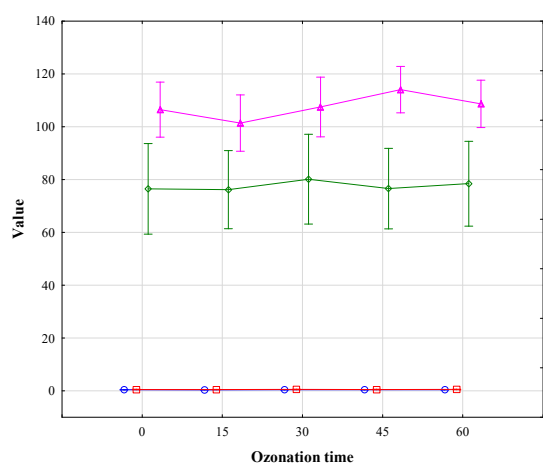

a)

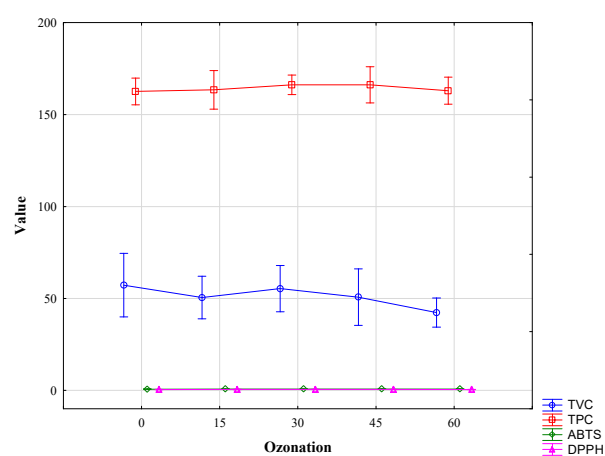

b)

**Figure S1.** Means plot and 95% confidence interval: for raspberries (panel a) and strawberries (panel b). Results of one-way analysis of variance (one-way ANOVA) taking into account the ozonation effect.

## PCA– antioxidant properties, bioactive compound

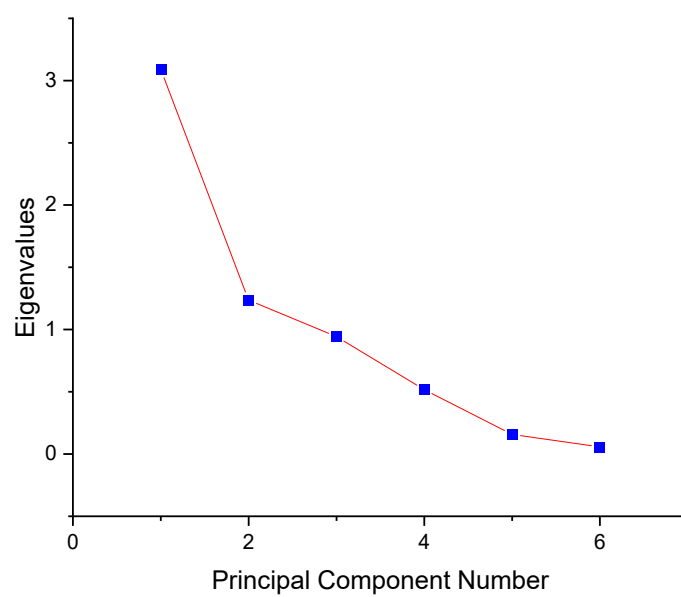

a)

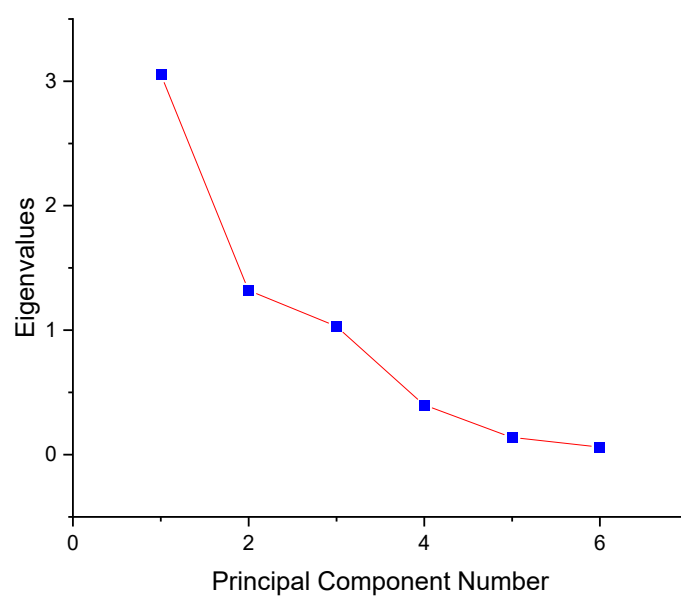

b)

**Figure S2.** Scree plot obtained from Principal Component Analysis (PCA) of the phenolic contents (TVC, TPC), antioxidant capacities (DPPH and ABTS), ozonation time and storage condition of raspberry (panel a) and strawberry (panel b).

## FTIR spectroscopy

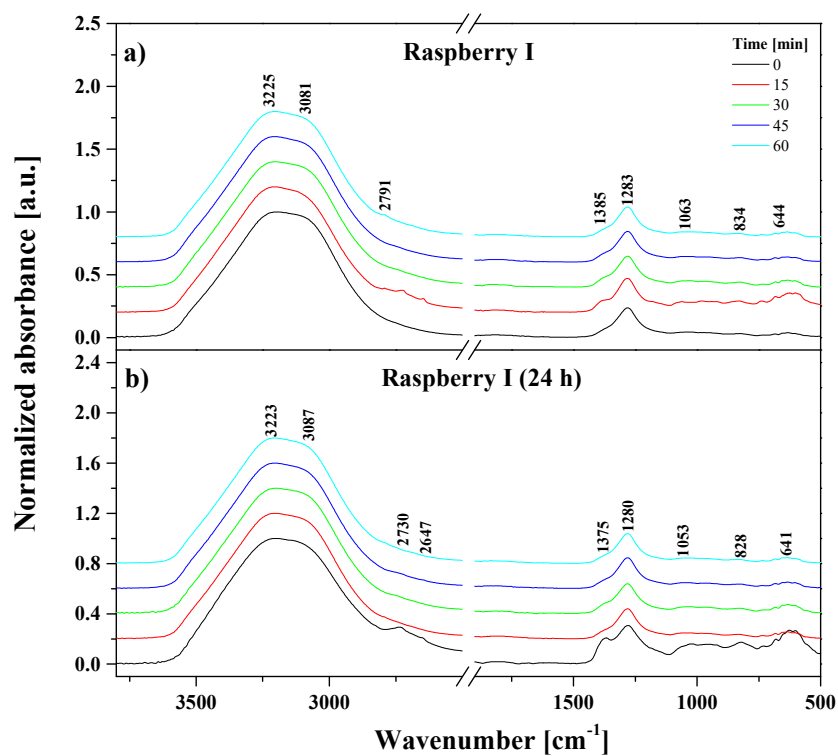

**Figure S3.** FTIR absorption spectra for the analyzed *Enrosadira* raspberry variety. One part of raspberry fruit was frozen immediately after ozonation (panel a). The second part of the raspberry fruit was stored for 24 h under refrigeration conditions and then also frozen (panel b).

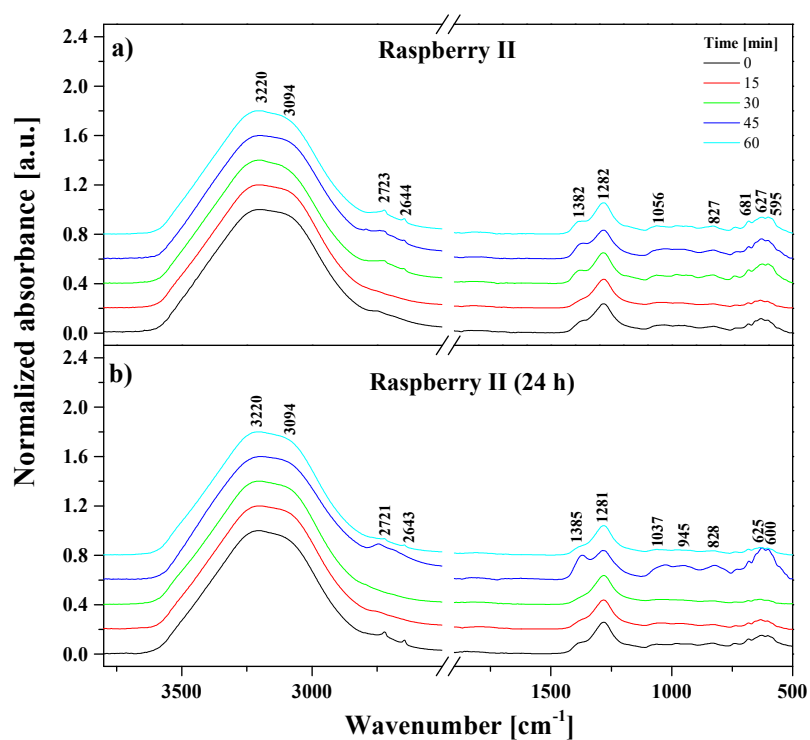

**Figure S4.** FTIR absorption spectra for the analyzed *Kwazi* raspberry variety. One part of raspberry fruit was frozen immediately after ozonation (panel a). The second part of the raspberry fruit was stored for 24 h under refrigeration conditions and then also frozen (panel b).

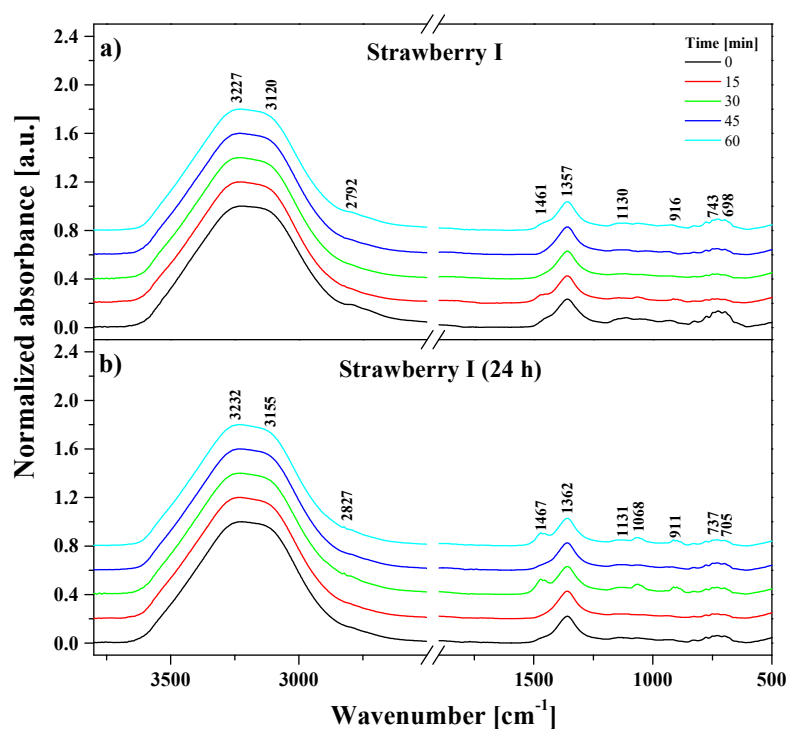

**Figure S5.** FTIR absorption spectra for the analyzed *Portola* strawberry variety. One part of raspberry fruit was frozen immediately after ozonation (panel a). The second part of the raspberry fruit was stored for 24 h under refrigeration conditions and then also frozen (panel b).



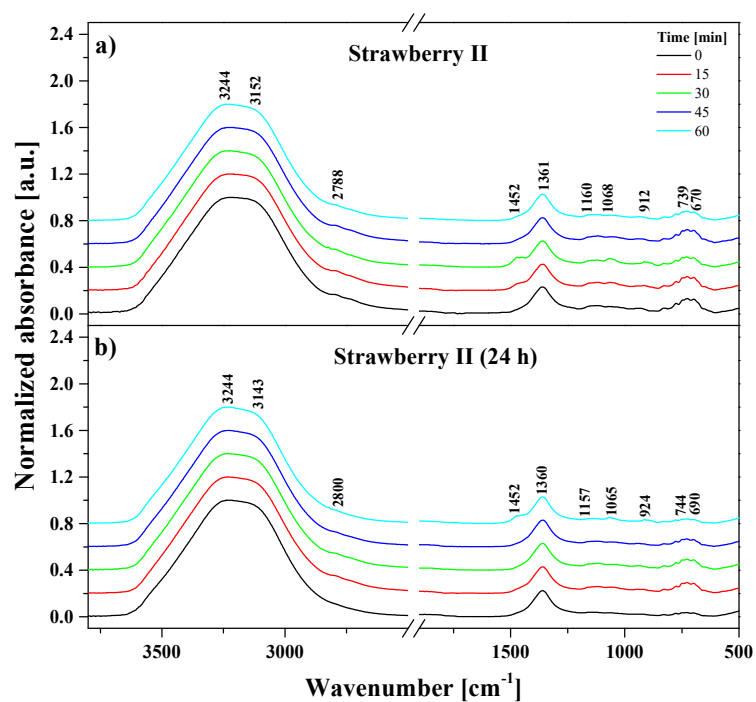

**Figure S6.** FTIR absorption spectra for the analyzed *Enduro* strawberry variety. One part of raspberry fruit was frozen immediately after ozonation (panel a). The second part of the raspberry fruit was stored for 24 h under refrigeration conditions and then also frozen (panel b).

## PCA– FTIR spectra

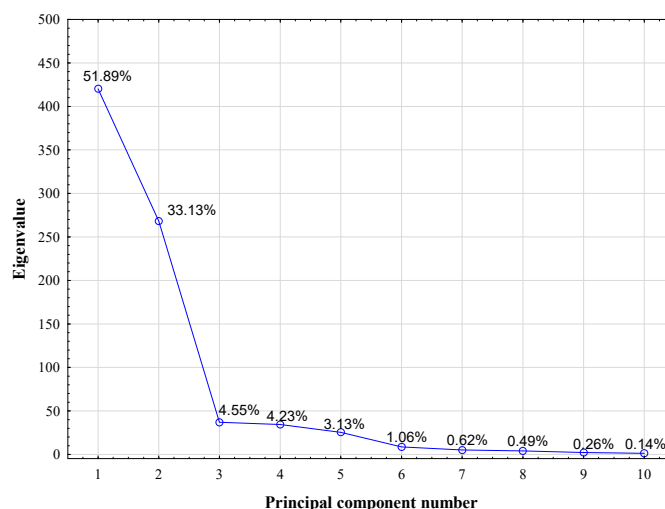

**Figure S7.** Scree plots (eigenvalues from principal components) for all examined samples of raspberry and strawberry from FTIR spectra (1800–500  $\text{cm}^{-1}$  region).

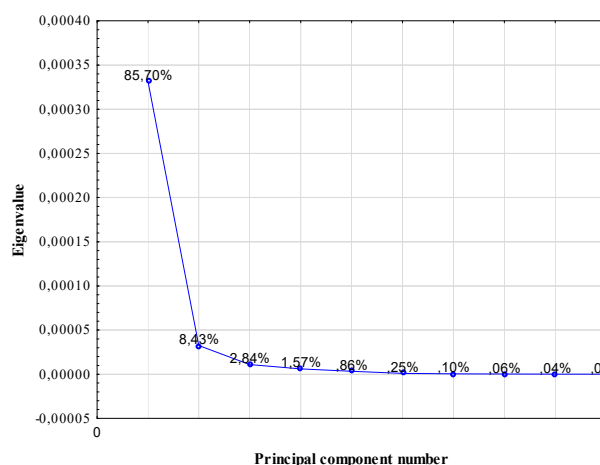

**Figure S8.** Scree plots (eigenvalues from principal components) for all examined samples of raspberry and strawberry from FTIR spectra (1800–500  $\text{cm}^{-1}$  region). The pre-processed (smoothing with 20 windows + 1st derivation) FTIR spectra.
